1 **Title:** Day Camp in the Time of COVID-19: What Went Right?

2 **Authors:** Sharon Nachman, MD<sup>1</sup>; Gabrielle Brauner, BS<sup>1</sup>; Aviva Beleck, BA<sup>1</sup>; Andrew S.  
3 Handel, MD<sup>1</sup>

4 **Author Affiliations:** <sup>1</sup> Department of Pediatrics, Stony Brook Children's Hospital, Stony Brook,  
5 NY

6 **Key Words:** COVID-19; Camp; Children; Infection Prevention; School

7 **Running Title:** Day Camp COVID-19 Experience

8 **Corresponding author:** Sharon Nachman, MD

9 **Address:** Division of Infectious Diseases, Department of Pediatrics, Stony Brook  
10 Children's Hospital, 101 Nicolls Road, HSC- T11, Stony Brook, NY 11794

11 **Telephone:** 631-444-7692

12 **Fax:** 631-444-7292

13 **Email:** [Sharon.nachman@stonybrookmedicine.edu](mailto:Sharon.nachman@stonybrookmedicine.edu)

14

15 **Alternate Corresponding author:** Andrew Handel, MD

16 **Address:** Division of Infectious Diseases, Department of Pediatrics, Stony Brook  
17 Children's Hospital, 101 Nicolls Road, HSC- T11, Stony Brook, NY 11794

18 **Telephone:** 631-444-7692

19 **Fax:** 631-444-7292

20 **Email:** [Andrew.handel@stonybrookmedicine.edu](mailto:Andrew.handel@stonybrookmedicine.edu)

21 **Funding Sources:** None

22 **Potential Conflicts of Interest:** None

23 **Abstract**

24 **Objective:** To evaluate whether a successful camp experience can be achieved with  
25 implementation of COVID-19 education, screening and hygiene protocols, and  
26 designated cohorts during the summer of 2020.

27 **Study Design:** A survey study of summer day camp directors in the metro-New York  
28 area was conducted in September, 2020. The survey inquired about camper  
29 demographics, COVID-10 related policies, and the number of COVID-19 cases and  
30 exposures at each camp.

31 **Results:** Responses were received from 77% (23/30) of camp directors at the completion  
32 of the 2020 summer. There were 8,480 camper children and 3,698 staff across the 23  
33 camps surveyed. A variety of precautions were taken to limit COVID-19 incidence  
34 among campers and staff, most often including COVID-19 screening at entry,  
35 cohorting campers, maximizing outdoor activities, mandating mask use when indoors,  
36 and frequent hand sanitizing. Six staff and one camper tested positive for COVID-19.  
37 There was no secondary spread within the staff or campers in any of the camps.

38 **Conclusion:** Camps successfully stayed open in the summer of 2020. The low level of  
39 COVID-19 in the community was critical to the initial success of camp opening.  
40 Policies that were consistent and maintained among the camps helped prevent further  
41 spread.

## 42 **Introduction**

43 Severe Acute Respiratory Syndrome Coronavirus 2 (SARS-CoV-2) emerged in December 2019,  
44 quickly leading to a global health crisis. As of August 2020, there have been 20 million cases  
45 and over 750,000 deaths internationally<sup>1</sup>. In March 2020, many states in the United States closed  
46 schools, nonessential businesses, and public gatherings in an attempt to slow the virus's spread.  
47 In May and June 2020, states began to gradually reopen these businesses and organizations. On  
48 June 1, New Jersey's Governor Murphy announced that summer day camps could open on July  
49 6.<sup>2</sup> On June 2, New York State's Governor Cuomo announced that summer day camps would be  
50 permitted to open as of June 29.<sup>3</sup> The United States Centers for Disease Control and Prevention  
51 (CDC) published guidelines for safely reopening camps, which included separating campers into  
52 non-mixing cohorts, encouraging six-foot social distancing, prioritizing outdoor activities,  
53 isolating campers when ill, enforcing mask use, and encouraging proper hand hygiene and  
54 sanitation<sup>4</sup>.

55 Long Island Camps and Private Schools Association (LICAPS) is an organization of twenty-two  
56 licensed summer day camps and private schools in Nassau and Suffolk County, New York,  
57 typically attended by hundreds of children and staff members<sup>5,6</sup>. Many LICAPS affiliates  
58 adopted policies and protocols for reducing COVID-19 cases among campers and staff, and  
59 subsequently opened for day camp during the summer of 2020. Investigation of how well these  
60 camps performed with regard to identifying COVID-19 cases, preventing virus spread, and  
61 adhering to pre-determined camp policies and CDC recommendations will have significant  
62 implications for reopening schools and maintaining an environment free of COVID-19.

63

64

## 65 **Methods**

66 We designed an original survey (Supplement 1) for distribution to the directors of day camps  
67 affiliated with LICAPS or located in other metro-New York regions. The survey inquired about  
68 general camp demographics, camp policies regarding COVID-19 screening and prevention, and  
69 actual illnesses occurring among campers and staff during the 2020 summer. The survey was  
70 distributed to all LICAPS camp directors, and other camp directors through three direct email  
71 messages over the course of one week in early September, 2020. Of the camps that did not  
72 submit a completed survey, specific targeted questions regarding camp size and COVID-19  
73 events were requested and received.

74 Our study was evaluated by the Stony Brook University Hospital institutional review board and  
75 deemed exempt. Study consent was assumed based upon completion of the survey instrument.  
76 Results were analyzed using descriptive statistics.

77

## 78 **Analysis:**

79 Working with LICAPS allowed us to contact many camps easily. This type of convenience  
80 sampling made it possible to reach a large number of camps quickly. Once the surveys were  
81 submitted, we were able to download the responses and analyze them for commonalities and  
82 outliers.

83

## 84 **Results**

## 85 **Camp Demographics**

86 23 of 30 camp directors invited to participate completed the survey (77% response rate). Of the  
87 camps that did not complete the survey, all responded to specific questions sent to the camp  
88 directors requesting limited information. Of those camps, all had an attendance size that fell  
89 within the ranges of the group that did respond.

90 Overall attendance was lower in 2020 than 2019, with a total 2020 attendance of 8,480 camper  
91 children and 3,698 staff across the 23 camps who completed the full survey. Attendance in 2019  
92 ranged from 300 to 1,300 campers per camp, compared to 100 to 1,000 campers in 2020 (Figure  
93 1). Compared to 2019, 12 camps had the same number of staff members, while the remaining 11  
94 camps hired fewer staff members. Staff size decreased on average by 83% (range decrease by  
95 525% to an increase by 4%).

96 On average, the proportion of campers in each of the designated age cohorts did not vary  
97 between 2019 and 2020: 23% of campers in 2020 were in Pre-Kindergarten/Kindergarten, (range  
98 0-55%), 53% were in Elementary School (range 38-55%), and 23% were in Middle School/High  
99 School (range 0-58%). All of the camps had similar numbers of males to females per age group.

100

## 101 **Cohorting**

102 Each of the camps surveyed employed closed cohort methodology to limit mixing between large  
103 groups of children. Camps maintained an average of 12 campers per cohort (range 3-30). Two  
104 camps allowed limited mixing across cohorts. One allowed mixing during drop off and pick up  
105 and the other allowed limited age-specific mixing during lunch and swim time. All other camps  
106 surveyed did not permit any mixing between the cohorts.

107

## 108 **Facilities**

109 All 23 camps conducted camp outside at least 75% of the time. Regularly used indoor facilities  
110 included changing rooms, activity areas, dining areas, health center, and bathrooms. When  
111 inclement weather was expected, 16 camps cancelled camp for the day, while others held indoor  
112 activities. Camps that cancelled for poor weather conditions missed an average of three days  
113 during the summer (range 1-7 days). When inclement weather developed during the day, nine  
114 camps held camp inside. There were no field trips in 2020. All camps except one had children  
115 change clothing indoors. 90% of the camps had campers eat meals outdoors, with half (10/21)  
116 requiring six-foot social distancing while eating.

117

## 118 **Screening**

119 Protocols for pre-camp COVID-19 screening varied. 11 camps required proof of a negative  
120 COVID-19 nasopharyngeal PCR from all campers within one week of the start date. Of the 12  
121 camps not requiring a negative COVID-19 PCR, nine required that campers have no COVID-19  
122 symptoms during the 2 weeks prior to starting camp, and one other camp required campers have  
123 no contact with SARS-CoV-2 infected individuals for two weeks prior to camp start. The  
124 remaining two camps did not require a negative COVID-19 PCR and did not provide details  
125 about pre-camp screening protocols.

126 Daily COVID-19 screening included a mandatory temperature check at all camps. In addition to  
127 temperature screening upon arrival onto the campgrounds, 10 camps also required morning home

128 temperature screens, and one camp screened campers' temperatures on the morning bus. 20/23  
129 (87%) of the camps also asked parents to complete daily symptom screening questionnaires.

130

### 131 **Transportation**

132 Each camp allowed private drop off for the arrival of the campers. In addition, seven of the  
133 camps also employed the use of buses, of which five cleaned the buses after every use and two  
134 cleaned the buses once daily.

135

### 136 **Masking and Hand Hygiene**

137 78% (18/23) of camps required some form of masking. The majority of camps (78%) required  
138 campers to wear a mask whenever inside. Two additional camps required campers to wear a  
139 mask when indoors for a prolonged time (i.e. for an activity, but not during change for swim).  
140 Only one camp required campers to wear masks all day. All camps except for one (96%)  
141 required staff members to wear masks. 65% of camps required staff members wear masks at all  
142 times, and 30% only required staff members wear masks when inside. All camps enforcing mask  
143 use did provide one when a camper or staff member did not bring one.

144 All 23 camps supplied hand sanitizer at multiple stations on their campgrounds, as well as soap  
145 and water near bathrooms, changing rooms, and the activity areas. Hand sanitizing by campers  
146 was required upon arrival to the campgrounds by 70% of camps, before and after activities by  
147 87% of camps, and before eating by 91%. 82% of camps required staff and campers to carry

148 sanitizer with them at all times. All camps reported sanitizing the camp on a nightly basis,  
149 though specific cleaning regimens were not reported.

150

### 151 **COVID-19 Symptomatic & Exposed Individuals**

152 All camps required campers or staff members with fever, shortness of breath, and/or cough to  
153 leave the campgrounds immediately. Most camps (78% for campers, 70% for staff) required  
154 documented clearance from a healthcare provider prior to returning. The majority of camps (83%  
155 for campers, 70% for staff) also required a two-day symptom-free period prior to returning.  
156 Only one camp required a negative COVID-19 assay for all sick campers prior to returning to  
157 camp. Regarding staff, one camp required all symptomatic staff members quarantine at home for  
158 two weeks prior to returning, and two camps required staff members demonstrate a negative  
159 COVID-19 test before returning. 11 camps required a note from the staff member's doctor and  
160 the staff member to be asymptomatic for 2 days before returning to camp.

161 The camps all developed protocols regarding return to camp for COVID-19 infected individuals.  
162 Most camps required infected individuals have a 14-day home isolation period after testing  
163 positive (82% for campers, 78% for staff) and a documented negative COVID-19 PCR (86% for  
164 campers; 78% for staff) prior to returning to camp. 74% of camps also required written clearance  
165 to return to camp from the camper's healthcare provider.

166

### 167 **Illness events**



168 Excluding symptoms due to laboratory-confirmed COVID-19, only 57/12,178 individuals  
169 developed an illness during a camp day. Daily, each camp had an additional 1-2 campers or staff  
170 out of attendance due to feeling ill. None of these resulted in a new COVID-19 diagnosis, and all  
171 required either written clearance from a healthcare provider, a COVID-19 test, or both prior to  
172 re-entry. Overall, the most common reasons campers and staff were sent home included fever (13  
173 campers and 19 staff members) and vomiting or diarrhea (11 campers and 14 staff). Symptoms  
174 concerning for COVID-19 accounted for sending 10 campers and 5 staff members home.  
175 COVID-19 exposures accounted for 4 campers and 3 staff being sent home. None of these  
176 individuals were COVID-19 positive.

177

#### 178 **Documented COVID-19 cases**

179 COVID-19 cases occurred in two camps. The first camp documented 1 camper and 5 staff  
180 members (with a common exposure outside of camp) with positive COVID-19 PCR testing, with  
181 an infection rate of 1.4%. The individual camper was ill on day 2 of camp, suggesting a prior  
182 outside exposure as well. One staff member, several days into the season, was diagnosed with  
183 COVID-19 at the second camp, giving an infection rate of 0.08%. Both infection rates were well  
184 below the local infection rate at that time, which were under 3% for the county where the first  
185 camp is located<sup>7</sup> and under 7% for where the second camp is located.<sup>8</sup> Of the camps that did not  
186 complete the survey, one camp also documented several cases of COVID-19. These individuals  
187 (4 campers and 8 staff members) tested positive around the 3<sup>rd</sup> week of camp. They were sent  
188 home to be isolated, the camp was closed for 1 week, and no further campers or staff were  
189 infected.

190

## 191 **Discussion**

192 Our understanding of COVID-19 transmission has changed countless times since the pandemic  
193 was first recognized. Among the many unresolved questions is the extent to which minimally  
194 symptomatic or entirely asymptomatic children contribute to the virus' propagation. As the vast  
195 majority of infected children exhibit few signs of illness<sup>9</sup>, a clear challenge exists in safely  
196 restarting schools and camps while minimizing inadvertent spread of the virus to other children,  
197 teachers, and the greater community. Our study found that, in a region with relatively well-  
198 controlled COVID-19 spread, and with close attention to prevention policies, new infections  
199 were uncommon among day camp attendees and staff. Further, the single outbreak that did occur  
200 was quickly halted, with only a handful of individuals infected, all from outside of the camp  
201 activities. A similar outcome, lack of spread among campers and staff, occurred in the camp with  
202 little in-depth information. Although not a controlled study, the tactics used by these camps may  
203 assist other childhood institutions in designing protocols for safely reopening.

204 A review of camp policies showed a high degree of similarity. This was due to industry-shared  
205 protocols. Although some policies may have differed between camps, these were limited. These  
206 included across all camps: decreasing the number of campers (due to a self-selective process of  
207 which families wanted to participate in camp), requiring staff members to wear masks when  
208 inside, isolating any person with any illness or COVID-19 symptoms or exposure. Other  
209 common policies included conducting camps in cohorts, holding most camp activities outside,  
210 daily temperature screening, providing ample hand sanitizer, and cleaning the camp nightly. The  
211 degree to which each of these strategies limited COVID-19 episodes in the camp cannot be  
212 determined.

213 Pivotal to the success of camp reopening was the low rate of infection in the community.  
214 Throughout the summer (starting in June), the percent positivity was under 3% for Suffolk  
215 County<sup>7</sup>, Nassau County<sup>7</sup>, and Somerset County<sup>8</sup>, and under 2% for New York County<sup>7</sup>,  
216 Westchester County<sup>8</sup>, and Rockland County<sup>7</sup>. Underscoring this point, the camp with one  
217 diagnosed COVID-19 case occurred in Burlington County, which had a much higher infection  
218 rate of 7%.<sup>8</sup>

219 Contact tracing and prevalence studies have suggested that those younger than 10-14 years old  
220 might be less susceptible to COVID-19 infection than those 20 years of age and older. There is  
221 also evidence that adolescents and children might contribute a smaller role in transmission of  
222 COVID-19 than people of other ages.<sup>10</sup> These would, in part, help explain the low rates of  
223 infection seen among day camps.

224 As a side product of masking of staff, screening of campers, and good hand hygiene, very low  
225 rates of other illnesses were seen as well. Most summers, cases of Coxsackievirus, Streptococcal  
226 pharyngitis, and acute viral gastroenteritis are common (personal communication Mark  
227 Transport, LICAPS President). This past summer, however, there were no cases of  
228 Coxsackievirus or Streptococcal pharyngitis among the 8,480 camper children and 3,698 staff  
229 members across the 23 camps surveyed.

230 What was difficult to quantify is the level of loyalty to the camp. Parents, staff, and campers all  
231 appreciated that what they did in and out of camp hours directly influenced the ability of the  
232 camp to succeed. Often campers and staff had a long-standing relationship with the individual  
233 camps, and a sense of community with that camp. By explicit and implicit discussion, they all  
234 understood that attendance in camp was a privilege and that disregard of social distancing, mask

235 wearing, and hand hygiene rules both inside and out of camp put continued attendance and  
236 success at risk.

237 Critical to success was ongoing good communication between staff, parents, and camp directors.  
238 Frequent contact between camp directors, staff, and parents permitted ongoing discussion and  
239 reinforcement of the camp's COVID-19 rules. Sleep away camps, which were prohibited from  
240 opening in New York State but allowed to open in twenty-five other states,<sup>11</sup> have also provided  
241 valuable insights into reopening during the pandemic. Notably, numerous sleep away camps  
242 throughout the United States were closed after opening due to COVID-19 outbreaks, despite  
243 following state specific guidelines<sup>11,12,13,14</sup>. Good communication was not always the norm for  
244 these camps as compared to the summer day camps in our survey. Typical examples of these  
245 poor communications included lack of notification to families when a camper tested positive or  
246 holding large group sessions to notify campers that a COVID-19 outbreak had occurred, risking  
247 further spread.<sup>12</sup> Additionally, one large camp of 7,000 campers seemingly did not adhere to its  
248 own social distancing policies.<sup>13</sup>

249 Just as with camps, reopening schools are now exploring optimal strategies for minimizing  
250 COVID-19 cases, and they may look to camp successes for guidance. One crucial difference is  
251 the general reliance of schools on indoor activities. Schools may benefit from strategies  
252 recommended by the CDC and employed by the camps, namely enforcing proper hand hygiene,  
253 mask use, social distancing, and student cohorting, facilitating frequent COVID-19 testing, and  
254 quickly isolating COVID-19 infected and exposed individuals. Frequent school-wide sanitizing  
255 and closures following a single case has been implemented since school reopening, though these  
256 practices are not evidence-based at this time.

257

258 **Conclusions**

259 When a decision was made to allow day camps to reopen in New York in summer 2020, many  
260 parents feared putting their children at risk by sending them to camp. We report here data from  
261 23 camps which responded to a survey regarding camp activities. The majority of the summer  
262 camps surveyed had no positive COVID-19 cases identified. Two summer camps who completed  
263 the full survey, and one additional camp who completed a partial survey had positive cases.  
264 There was no spread within the camps due to fast recognition and action. These camps were  
265 successful because of a low level of virus in the community, effective screening practices,  
266 emphasizing outdoor activities, and proper hygiene and masking. With these examples of  
267 successful summer camp experiences, we are hopeful that safe school reopening and limiting  
268 COVID-19 spread within the school and the community at large can be maintained.

269

270 **Acknowledgements:** The following camps participated in the survey. We thank all of their staff  
271 and leadership for providing us with the data described in the manuscript. In alphabetical order:

272 Breezemont Day Camp (Gordon Josey), Brookhaven Country Day Camp (Michael Pollack),  
273 Camp Jacobson (Paul Isserles), Camp Nabby (Rita C. Bertino), Crestwood Day Camp (Mark  
274 Transport and Mark Hemmerdinger), Deerkill Day Camp (Todd Rothman), Driftwood Day  
275 Camp (Mike Wagenberg and Ron Kuznetz), Elmwood Day Camp (Gregg Licht), Hidden Pond  
276 Day Camp (Matt Pagliari), Ivy League Day Camp (Meredith Stern), Kenwal Day Camp (Howard  
277 Feinstein), Liberty Lake Day Camp (Andy Pritikin), Maplewood School & Summer Program  
278 (Sheri Holden), Mohawk Day Camp (Adam Wallach), North Shore Day Camp (Joni Iacono),  
279 Oak Crest Day Camp (Jonathon Gold), Park Shore Country Day Camp (Robert Budah), Pierce

280 Day Camp (Will and Courtney Pierce), Rolling River Day Camp (Marissa Allaben and Mark  
281 Goodman), Shibley Day Camp (Heath Levine), Summer Trails Day Camp (Jamie Sirkin), The  
282 Nature Place Day Camp (Scott Dunn), Woodmont Day Camp (Sam Borek)

283 **Abbreviations:**

284 SARS-CoV-2: Severe Acute Respiratory Syndrome Coronavirus 2

285 CDC: Centers for Disease Control and Prevention

286 LICAPS: Long Island Camps and Private Schools Association

287

288 **References**

- 289 1. COVID-19 Map. <https://coronavirus.jhu.edu/map.html>. Accessed September 12, 2020.
- 290 2. Feuer W. New Jersey to open outdoor dining, retail shops on June 15 as tri-state region  
291 slowly eases restrictions. [https://www.cnbc.com/2020/06/01/coronavirus-new-jersey-to-](https://www.cnbc.com/2020/06/01/coronavirus-new-jersey-to-open-for-outdoor-dining-retail-on-june-15.html)  
292 [open-for-outdoor-dining-retail-on-june-15.html](https://www.cnbc.com/2020/06/01/coronavirus-new-jersey-to-open-for-outdoor-dining-retail-on-june-15.html). Published June 1, 2020. Accessed  
293 September 22, 2020.
- 294 3. NBC New York. New York Sets Opening Date for Summer Day Camps; Western NY  
295 Enters Phase II. [https://www.nbcnewyork.com/news/local/new-york-sets-opening-date-](https://www.nbcnewyork.com/news/local/new-york-sets-opening-date-for-summer-day-camps-western-ny-enters-phase-ii/2443390/)  
296 [for-summer-day-camps-western-ny-enters-phase-ii/2443390/](https://www.nbcnewyork.com/news/local/new-york-sets-opening-date-for-summer-day-camps-western-ny-enters-phase-ii/2443390/). Published June 3, 2020.  
297 Accessed October 1, 2020.
- 298 4. Suggestions for Youth and Summer Camps. Centers for Disease Control and Prevention.  
299 [https://www.cdc.gov/coronavirus/2019-ncov/community/schools-childcare/summer-](https://www.cdc.gov/coronavirus/2019-ncov/community/schools-childcare/summer-camps.html)  
300 [camps.html](https://www.cdc.gov/coronavirus/2019-ncov/community/schools-childcare/summer-camps.html). Accessed September 12, 2020.
- 301 5. About LICAPS. Long Island Camps and Private Schools.  
302 <http://www.longislanddaycamps.com/about-licaps/>. Published November 2, 2018.  
303 Accessed September 12, 2020.
- 304 6. Day Camp Directory. Long Island Camps and Private Schools.  
305 <http://www.longislanddaycamps.com/day-camp-directory/>. Published January 16, 2019.  
306 Accessed September 12, 2020.
- 307 7. Percentage Positive Results By County Dashboard. [https://forward.ny.gov/percentage-](https://forward.ny.gov/percentage-positive-results-county-dashboard)  
308 [positive-results-county-dashboard](https://forward.ny.gov/percentage-positive-results-county-dashboard). Accessed September 14, 2020.

- 309 8. New Jersey Statistics. New Jersey Department of Health.  
310 [https://www.nj.gov/health/cd/documents/topics/NCOV/COVID\\_Confirmed\\_Case\\_Summary.pdf](https://www.nj.gov/health/cd/documents/topics/NCOV/COVID_Confirmed_Case_Summary.pdf). Published 2020. Accessed September 14, 2020.  
311
- 312 9. Liguoro I, Pilotto C, Bonanni M, et al. SARS-COV-2 infection in children and newborns:  
313 a systematic review. *European Journal of Pediatric*.  
314 [https://www.ncbi.nlm.nih.gov/pmc/articles/PMC7234446/pdf/431\\_2020\\_Article\\_3684.pdf](https://www.ncbi.nlm.nih.gov/pmc/articles/PMC7234446/pdf/431_2020_Article_3684.pdf)  
315 f. Published 2020. Accessed September 12, 2020
- 316 10. Viner RM, Mytton OT, Bonell C, et al. Susceptibility to SARS-CoV-2 Infection Among  
317 Children and Adolescents Compared With Adults. *JAMA Pediatrics*. 2020.  
318 doi:10.1001/jamapediatrics.2020.4573
- 319 11. State Opening Guidance for Summer 2020. Box.  
320 <https://acacamps.app.box.com/s/gwjgyzbzlmactz1awhwp3d49chsxrqvn>. Published 2020.  
321 Accessed September 12, 2020.
- 322 12. Golden A. Kanakuk Kamps battle a COVID cluster. *NBCNews.com*.  
323 <https://www.nbcnews.com/news/us-news/kanakuk-kamps-battle-COVID-cluster-n1233186>. Published July 10, 2020. Accessed September 12, 2020.  
324
- 325 13. Carroll PC and S. Arkansas summer camp closes after campers, staff test positive for  
326 virus. *KATV*. [https://katv.com/news/local/arkansas-summer-camp-closes-after-campers-](https://katv.com/news/local/arkansas-summer-camp-closes-after-campers-staff-test-positive-for-virus)  
327 [staff-test-positive-for-virus](https://katv.com/news/local/arkansas-summer-camp-closes-after-campers-staff-test-positive-for-virus). Published July 9, 2020. Accessed September 12, 2020.
- 328 14. Slotkin J. At Least 82 Coronavirus Cases Linked To Missouri Sleepaway Camp. *NPR*.  
329 <https://www.npr.org/sections/coronavirus-live-updates/2020/07/10/889718877/at-least->



330 82-coronavirus-cases-linked-to-missouri-sleepaway-camp. Published July 10, 2020.

331 Accessed September 12, 2020.

332

333 **Figure Legend**

334 Figure 1: Number of campers in attendance at each surveyed camp in 2019 and 2020

335

336 **Supplement Legend**

337 Supplement 1: Complete survey instrument

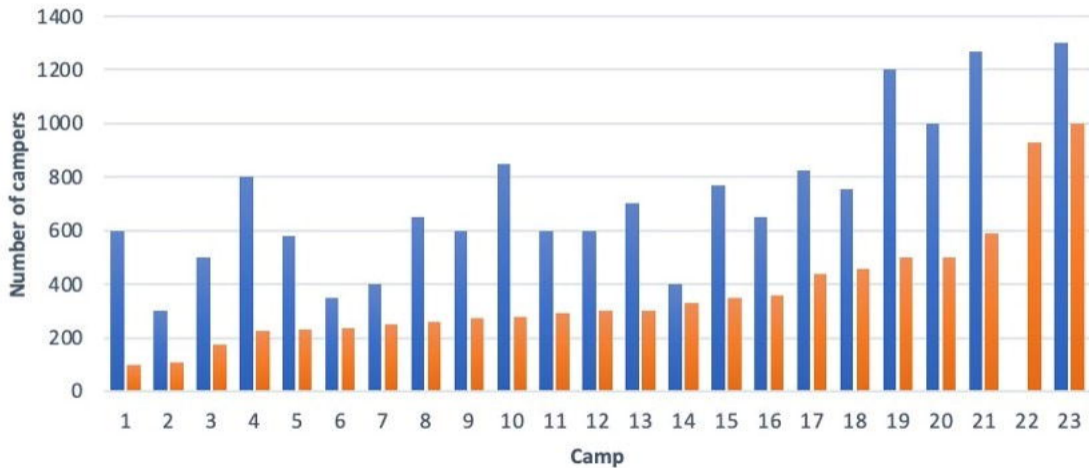

Source: https://www.medrxiv.org/content/10.1101/2021.03.11.21253309v1.full.pdf
